# Supplementary material
Source: PubMed Central journal article supplement (PMC7874909)
Supplement: mmc1.pdf [file mmc1.pdf]

## Supplemental information

### Time-resolved systems immunology reveals

### a late juncture linked to fatal COVID-19

Can Liu, Andrew J. Martins, William W. Lau, Nicholas Rachmaninoff, Jinguo Chen, Luisa Imberti, Darius Mostaghimi, Danielle L. Fink, Peter D. Burbelo, Kerry Dobbs, Ottavia M. Delmonte, Neha Bansal, Laura Failla, Alessandra Sottini, Eugenia Quiros-Roldan, Kyu Lee Han, Brian A. Sellers, Foo Cheung, Rachel Sparks, Tae-Wook Chun, Susan Moir, Michail S. Lionakis, NIAID COVID Consortium, COVID Clinicians, Camillo Rossi, Helen C. Su, Douglas B. Kuhns, Jeffrey I. Cohen, Luigi D. Notarangelo, and John S. Tsang

|                                                                      | Healthy Control | Moderate-Alive | Severe-Alive | Critical-Alive | Critical-Deceased |
|----------------------------------------------------------------------|-----------------|----------------|--------------|----------------|-------------------|
| <b>Subject Count</b>                                                 | 14 <sup>^</sup> | 3              | 5            | 21             | 4                 |
| <b>Age in Years<sup>1</sup></b>                                      | 53 [30-77]      | 55 [35-57]     | 54 [24-84]   | 54 [37-79]     | 74.5 [71-77]      |
| <b>Male</b>                                                          | 11 (78.6%)      | 2 (66.7%)      | 3 (60%)      | 19 (90.5%)     | 3 (75%)           |
| <b>Race</b>                                                          |                 |                |              |                |                   |
| Asian                                                                | 1 (7.1%)        | -              | -            | 1 (4.8%)       | -                 |
| Black                                                                | -               | -              | -            | 1 (4.8%)       | -                 |
| White                                                                | 3 (21.4%)       | 3 (100%)       | 4 (80%)      | 19 (90.5%)     | 3 (75%)           |
| Unknown                                                              | 10 (71.4%)      | -              | 1 (20%)      | -              | 1 (25%)           |
| <b>Days between Symptom Onset and Hospital Admission<sup>1</sup></b> |                 | 16 [5-17]      | 12 [3-16]    | 7.5 [0-24]     | 6.5 [3-14]        |
| <b>Ever admitted to ICU</b>                                          |                 | -              | -            | 3 (14.3%)      | 1 (25%)           |
| <b>Comorbidity *</b>                                                 |                 |                |              |                |                   |
| Arrhythmia                                                           |                 | -              | 2 (40%)      | 3 (14.3%)      | 1 (25%)           |
| Autoimmune/Immunodysregulation Disorders                             |                 | 2 (66.7%)      | -            | 6 (28.6%)      | -                 |
| Cancer/Heme Malignancy/Lymphoma                                      |                 | 1 (33.3%)      | -            | 6 (28.6%)      | 2 (50%)           |
| Cardiovascular Disease/Congestive Heart Failure                      |                 | -              | 3 (60%)      | 3 (14.3%)      | 2 (50%)           |
| Diabetes Mellitus                                                    |                 | -              | -            | 4 (19%)        | -                 |
| Endocrinopathy/Thyroid Disease                                       |                 | 1 (33.3%)      | 1 (20%)      | -              | 1 (25%)           |
| GI/Liver Disease                                                     |                 | -              | 1 (20%)      | 4 (19%)        | 1 (25%)           |
| HIV                                                                  |                 | 1 (33.3%)      | -            | 4 (19%)        | -                 |
| Hypertension                                                         |                 | -              | 1 (20%)      | 8 (38.1%)      | 2 (50%)           |
| Immunodeficiency (Primary and Secondary)                             |                 | 2 (66.7%)      | -            | 4 (19%)        | -                 |
| Infectious Disease Disorders (Chronic)                               |                 | 1 (33.3%)      | -            | 6 (28.6%)      | 1 (25%)           |
| Neurological/Neuropsychiatric disease                                |                 | -              | 1 (20%)      | 3 (14.3%)      | -                 |
| No Comorbidities                                                     |                 | -              | 2 (40%)      | 3 (14.3%)      | 1 (25%)           |
| <b>Symptom *</b>                                                     |                 |                |              |                |                   |
| Asthenia                                                             |                 | 2 (66.7%)      | 1 (20%)      | 3 (14.3%)      | -                 |
| Cough                                                                |                 | 1 (33.3%)      | 4 (80%)      | 14 (66.7%)     | 2 (50%)           |
| Dyspnea                                                              |                 | 1 (33.3%)      | 2 (40%)      | 9 (42.9%)      | 4 (100%)          |
| Fever                                                                |                 | 3 (100%)       | 4 (80%)      | 19 (90.5%)     | 3 (75%)           |
| Pneumonia                                                            |                 | 3 (100%)       | 5 (100%)     | 21 (100%)      | 4 (100%)          |
| Respiratory Distress                                                 |                 | 2 (66.7%)      | 4 (80%)      | 17 (81%)       | 2 (50%)           |

**Severity definition:**

Moderate – Fever, respiratory symptoms, and radiological evidence of pneumonia

Severe – SpO<sub>2</sub> at rest ≤ 93%, respiratory rate > 30 breaths/min, or PaO<sub>2</sub>/FiO<sub>2</sub> < 300

Critical – Septic shock, organ damage requiring ICU admission, and/or the need for mechanical ventilation

<sup>^</sup> One healthy individual (w/o demographics) was run on all batches for quality control

\* Phenotypes with less than three total counts across patients are excluded from the list

<sup>1</sup> NA (Not Available) values are excluded from statistics; median [min – max] values shown
