# Supplementary material
Source: PubMed Central journal article supplement (PMC7874909)
Supplement: mmc8.pdf [file mmc8.pdf]

## **CONSORTIA MEMBER AFFILIATIONS**

### **NIAID COVID Consortium**

Michael S. Abers, Laboratory of Clinical Immunology and Microbiology, NIAID, NIH, Bethesda, MD 20892, USA

Richard Apps, NIH Center for Human Immunology, NIAID, NIH, Bethesda, MD 20892, USA

Marita Bosticardo, Laboratory of Clinical Immunology and Microbiology, NIAID, NIH, Bethesda, MD 20892, USA

Pedro Milanez-Almeida, NIH Center for Human Immunology, NIAID, NIH, Bethesda, MD 20892, USA

Matthew P. Mulè, Multiscale Systems Biology Section, Laboratory of Immune System Biology, NIAID, NIH, Bethesda, MD 20892, USA and NIH Oxford-Cambridge Scholars Program; Cambridge Institute for Medical Research and Department of Medicine, University of Cambridge, UCB2 0QQ, UK

Elana Shaw, Laboratory of Clinical Immunology and Microbiology, NIAID, NIH, Bethesda, MD 20892, USA

Yu Zhang, Laboratory of Clinical Immunology and Microbiology, NIAID, NIH, Bethesda, MD 20892, USA

### **COVID Clinicians**

Francesco Castelli, Department of Infectious and Tropical Diseases, University of Brescia and ASST Spedali Civili di Brescia, Brescia, 25123, Italy

Maria Lorenza Muiesan, 2nd Division Internal Medicine, ASST Spedali Civili di Brescia; Department of Clinical and Experimental Sciences, University of Brescia, Brescia, 25123, Italy

Gabriele Tomasoni, First Division of Anesthesiology and Critical Care Medicine, ASST Spedali Civili di Brescia, Brescia, 25123, Italy

Francesco Scolari, Division of Nephrology, University of Brescia and ASST Spedali Civili di Brescia, Brescia, 25123, Italy

Alessandra Tucci, Hematology Department, ASST Spedali Civili di Brescia, Brescia, 25123, Italy
